# Supplementary material
Source: PubMed Central journal article supplement (PMC5441840)
Supplement: NIHMS858210-supplement-KucharskaEtAlSupplement.pdf [file NIHMS858210-supplement-KucharskaEtAlSupplement.pdf]

**A***E. coli* F583 Rd2 LPS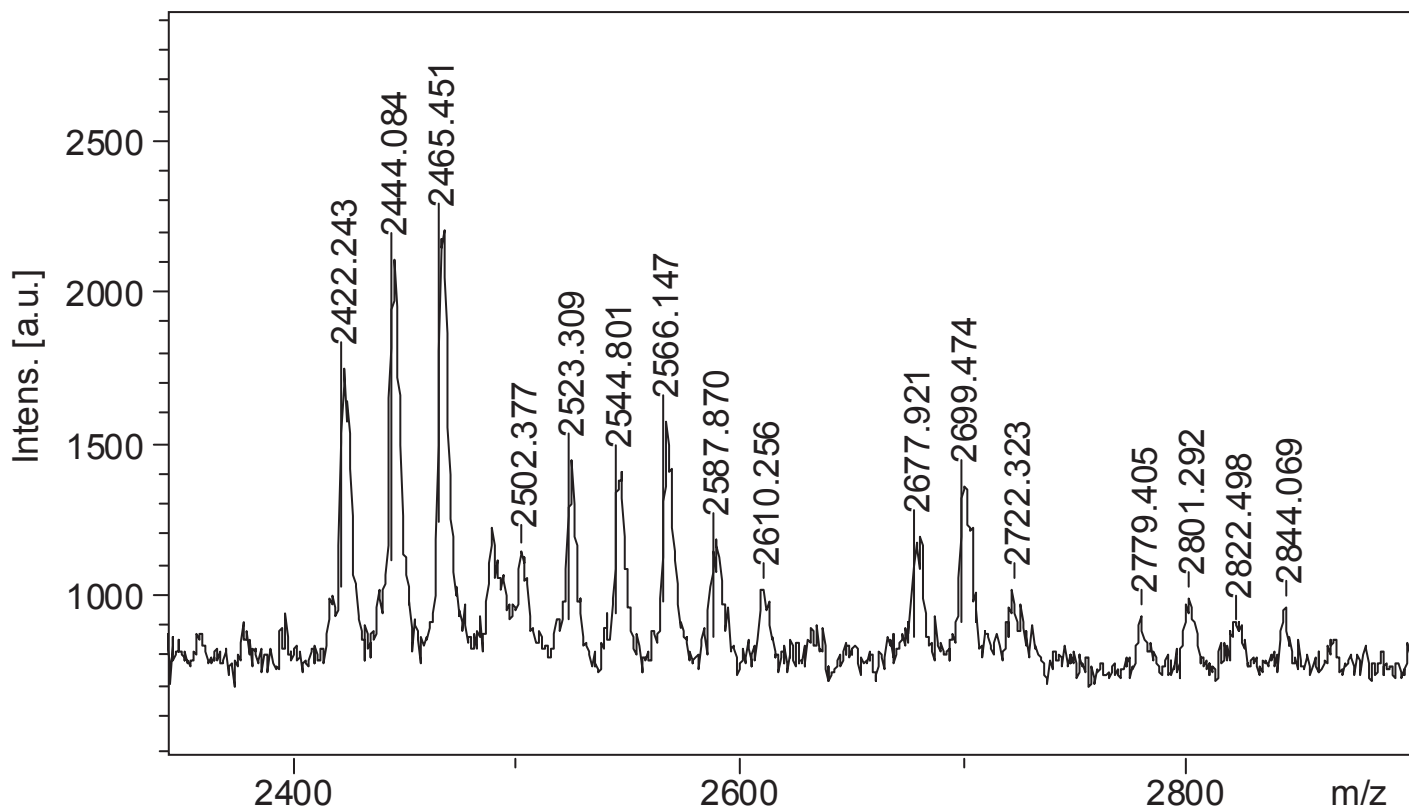**B**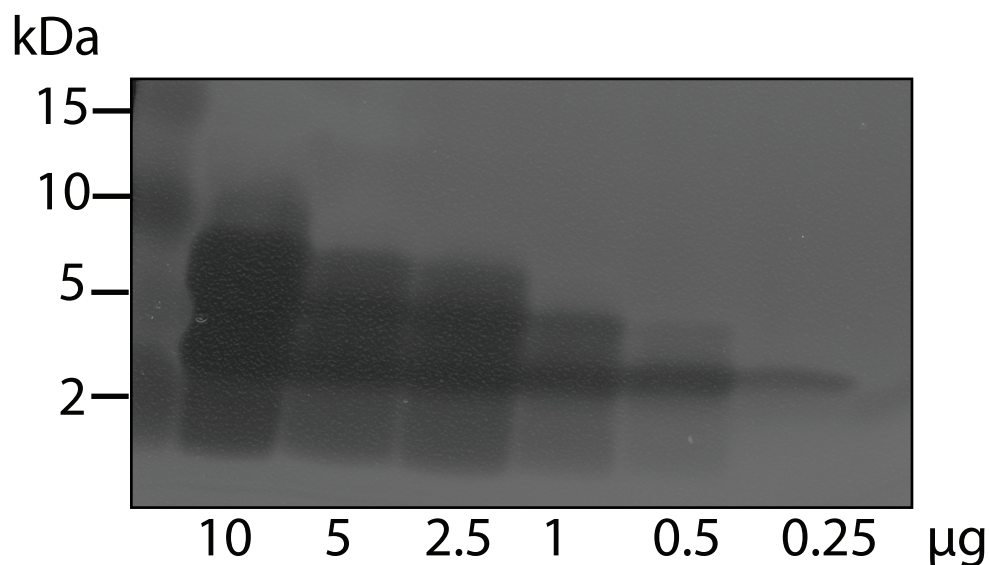

**Supplemental Figure 1.** Characterization of Rd2 LPS from *E. coli* F583. **(A)** MALDI mass spectrum of Rd2 LPS from *E. coli* F583 with m/z values of the main peaks indicated. **(B)** Zinc-imidazole-stained SDS-PAGE gel with different amounts of Rd2 LPS from *E. coli* F583 applied to lanes as indicated.

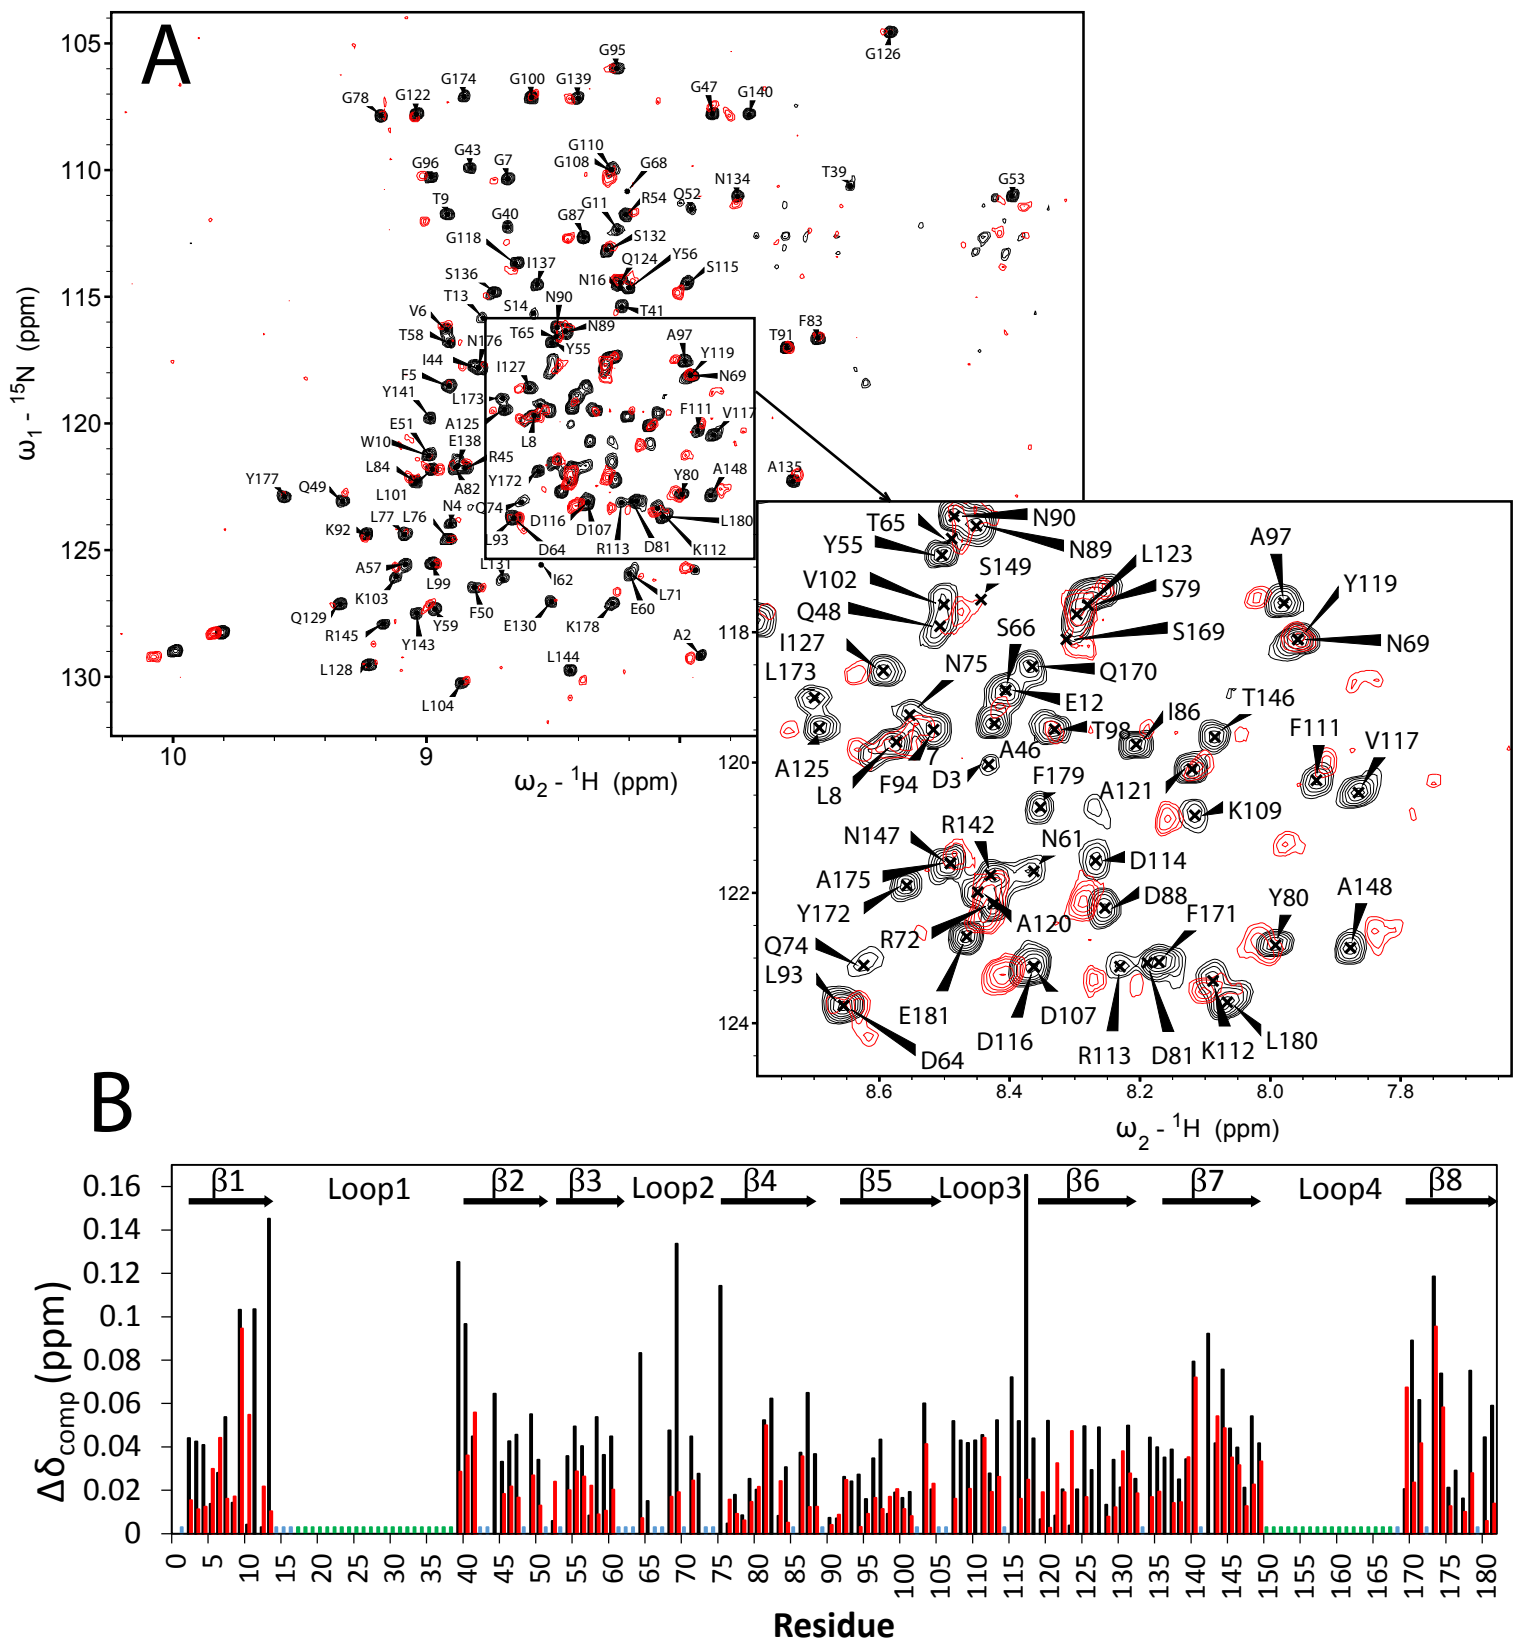

**Supplemental Figure 2.** Chemical shift perturbations in  ${}^{15}\text{N}$ - ${}^1\text{H}$  TROSY spectra upon addition of Rd2 LPS from *E. coli* F583 to  ${}^2\text{H}$ -, ${}^{13}\text{C}$ -, ${}^{15}\text{N}$ -labeled OprH $\Delta$ L1 $\Delta$ L4 in DHPC micelles. **(A)**  ${}^{15}\text{N}$ - ${}^1\text{H}$  TROSY spectrum of 0.2 mM OprH $\Delta$ L1 $\Delta$ L4 (black) in DHPC micelles overlaid onto the spectrum of OprH $\Delta$ L1 $\Delta$ L4 in DHPC:Rd2 LPS mixed micelles (red, 10:1 Rd2 LPS:OprH molar ratio). **(B)** Compound chemical shift changes  $\Delta\delta_{\text{comp}} = [\Delta\delta_{\text{HN}}^2 + (\Delta\delta_{\text{N}}/6.5)^2]^{1/2}$  resulting from the addition of 2 mM Rd2 LPS (black) relative to the chemical shifts of 0.2 mM OprH $\Delta$ L1 $\Delta$ L4 in DHPC only. Unassigned residues are marked with blue ticks, and removed loop residues are marked with green ticks.



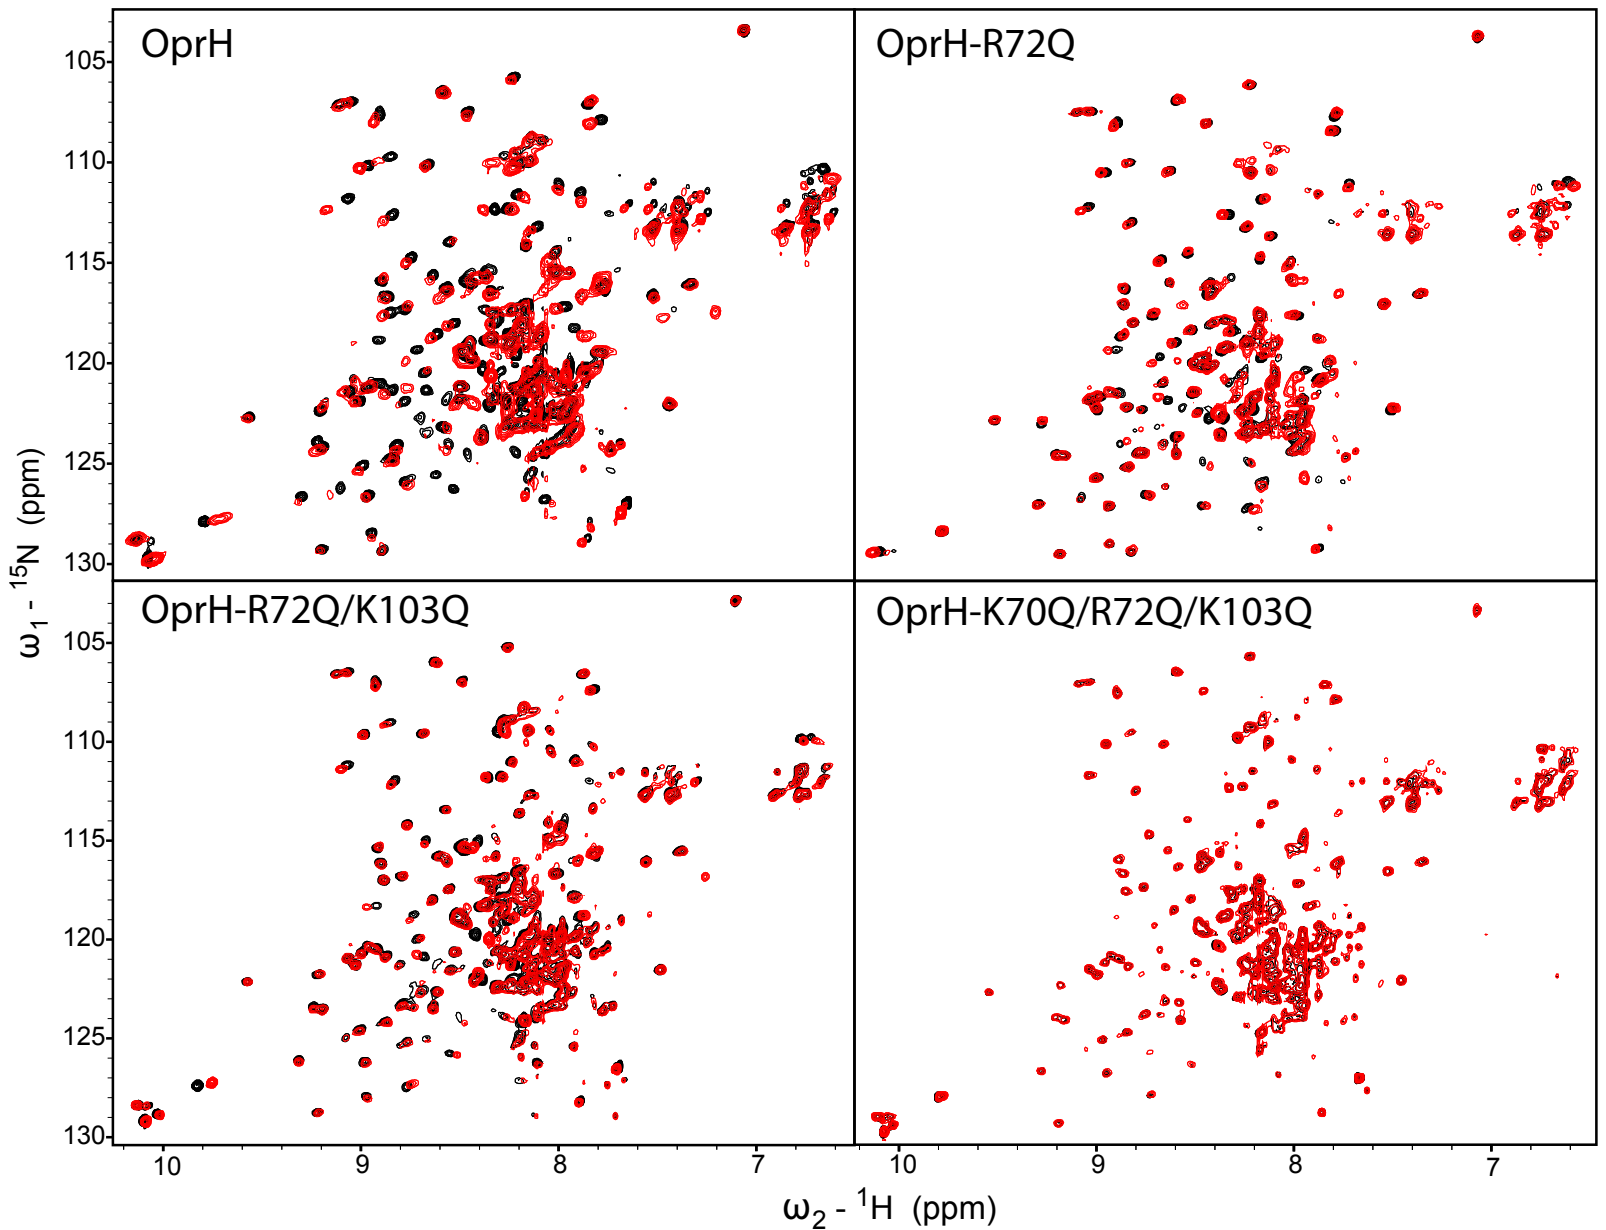

**Supplemental Figure 4.**  $^{15}\text{N}$ - $^1\text{H}$  TROSY spectra of  $^{15}\text{N}$ -labeled OprH, OprH-R72Q, OprH-R72Q/K103Q and OprH-K70Q/R72Q/K103Q in DHPC micelles (black), overlaid onto the spectra of corresponding proteins in DHPC:Kdo2-lipid A mixed micelles at 10:1 Kdo2-lipid A:protein molar ratio (red).
